# Supplementary material for: Long-term potentiation is independent of the C-tail of the GluA1 AMPA receptor subunit
Source: eLife. 2020 Aug 24;9:e58042. doi: 10.7554/eLife.58042 (PMC7500950; doi:10.7554/eLife.58042)
Supplement: Figure 1—figure supplement 1—source data 1. — Chimeric GluA1/A2CTD traffics constitutively to the synapse. [file elife-58042-fig1-figsupp1-data1.xlsx]

## Sheet: Panel B
Source data Figure S1
Synaptic AMPAR rectification index							Statistics summary
	Cell #	RI					T-test
Control	1	0.765625					P value	<0.0001
	2	0.788079					P value summary	****
	3	1.05729					Significantly different (P < 0.05)?	Yes
	4	1.26875
	5	1.0041
	6	0.878514
	7	0.804662
	8	0.984375
	9	1.25472
	10	1.26103
	11	0.957895
	12	0.714286
GluA1/A2CTD OE	1	0.321429
	2	0.25
	3	0.472973
	4	0.774038
	5	0.514706
	6	0.56875
	7	0.4375
	8	0.12963
	9	0.617647
	10	0.372951
