# Supplementary material for: Long-term potentiation is independent of the C-tail of the GluA1 AMPA receptor subunit
Source: eLife. 2020 Aug 24;9:e58042. doi: 10.7554/eLife.58042 (PMC7500950; doi:10.7554/eLife.58042)
Supplement: Figure 1—figure supplement 2—source data 1. — GluA1/A2CTD and GluA2(R) form non-rectifying heteromeric AMPAR. [file elife-58042-fig1-figsupp2-data1.xlsx]

## Sheet: Panel B
Source data Figure S2
Synaptic AMPAR rectification index							Statistics summary
	Cell #	RI					T-test
Control	1	0.68					P value	<0.0001
	2	0.71					P value summary	****
	3	0.95					Significantly different (P < 0.05)?	Yes
	4	1.02
	5	1.15
AMPAR replacement with GluA1/A2CTD	1	0.08
	2	0.09
	3	0
	4	0.14
	5	0.27

## Sheet: Panel C
Source data Figure S2
Synaptic AMPAR rectification index							Statistics summary
	Cell #	RI					T-test
Control	1	0.79					P value	0.7997
	2	0.87					P value summary	ns
	3	0.89					Significantly different (P < 0.05)?	No
	4	0.98
AMPAR replacement with GluA1/A2CTD + GluA2(R)	1	0.74
	2	0.83
	3	0.92
	4	1.14
