# Supplementary material for: Long-term potentiation is independent of the C-tail of the GluA1 AMPA receptor subunit
Source: eLife. 2020 Aug 24;9:e58042. doi: 10.7554/eLife.58042 (PMC7500950; doi:10.7554/eLife.58042)
Supplement: Figure 1—figure supplement 3—source data 1. — Validation of the CRISPR-mediated GluA1 deletion. [file elife-58042-fig1-figsupp3-data1.xlsx]

## Sheet: Panel C
Source data Figure S3
Raw data					Statistics summary
	AMPAR EPSC				Wilcoxon test
pair #	control	transfected			P value	<0.0001
1	27	6.5			Exact or approximate P value?	Exact
2	95	22			P value summary	****
3	118	128
4	169	31
5	70	59
6	166	62
7	97	65
8	30	16
9	47	53
10	119	44
11	96	20
12	82	18
13	51	6
14	49	31
15	67	22
16	151	23
17	109	27
18	72	32
19	144	34
20	78	21
21	189	109
mean	96.4762	39.5
sem	10.2064	6.83513
n	21	21

## Sheet: Panel D
Source data Figure S3
Raw data					Statistics summary
	NMDAR EPSC				Wilcoxon test
					P value	0.3479
pair #	control	transfected			Exact or approximate P value?	Exact
1	34	45			P value summary	ns
2	12	16
3	15	21
4	27	9
5	27	20
6	10	19
7	8	26
8	19	8
9	56	87
10	18	34
11	29	29
12	23	19
13	36	19
14	47	47
15	58	89
mean	27.9333	32.5333
sem	4.08419	6.49019
n	15	15

## Sheet: Panel E
Source data Figure S3
LTP Experiment
		GluA1 knock-down									Control													Expt Ave	Expt SEM	Cntrl Ave	Cntrl SEM		Statistics summary (min 45)
	Cell #	1	2	3	4	5	6	7	8	9	1	2	3	4	5	6	7	8	9	10	11	12							T-test
	Time (min)																												P value	0.0051
Baseline	-3		85.7672	81.3008	84.2882	88.3227	89.4737	70.0102	94.7024	94.3373	60.1685	79.2795			87.0073	71.5054	65.6678		96.7519	60.0985	69.1538	74.132		86.0253	2.814	73.7516	4.07886		P value summary	**
	-2	106.015	102.114	109.743	125.321	99.7036	98.9185	102.971	80.6081	115.642	123.856	99.5253	73.169	93.117	92.5767	83.1112	89.8278	110.585	93.0668	80.6112	128.56	110.791		104.56	4.11712	98.2331	4.93221		Significantly different (P < 0.05)?	Yes
	-1	93.9854	112.119	108.957	90.3904	111.974	111.608	127.019	124.69	90.0203	115.976	121.195	126.831	106.883	120.416	145.383	144.504	89.4148	110.181	159.29	102.286	115.077		107.862	4.58947	121.453	5.7535
Pairing	0
	1
Post pairing	2	91.3325	71.4795	115.051	85.7914	143.27	78.7247	181.609	31.3418	135.243	146.186	134.823	371.803	289.584	437.594	299.486	164.098	43.3777	274.273	90.8071	562.584	163.033		103.76	14.9678	248.137	44.3232
	3	125.371	108.701	89.1868	100.453	147.998	61.9611	150.943	39.976	207.832	212.227	172.689	269.921	321.04	422.42	288.006	187.886	76.4982	202.807	81.8455	392.196	195.918		114.714	16.8592	235.288	31.2652
	4	141.201	167.047	96.5075	89.9308	176.742	58.0926	146.5	23.6809	199.377	279.451	142.669	369.049	328.74	477.745	343.699	231.996	59.2127	189.682	145.199	345.401	207.505		122.12	19.5118	260.029	34.2067
	5	120.477	137.318	88.0011	104.656	119.254	79.6274	185.333	30.474	179.649	225.663	121.949	381.74	440.157	578.988	459.63	255.68	97.4615	253.32	165.086	373.961	245.123		116.088	16.1991	299.897	42.5261
	6	109.171	133.283	71.5259	109.112	128.072	110.544	194.338	31.6168	226.908	279.237	122.927	389.181	440.157	773.348	585.37	286.29	123.761	248.671	194.59	241.749	246.05		123.841	19.5614	327.611	55.5296
	7	160.827	138.801	80.2116	90.8788	110.585	83.1736	193.834	59.6784	302.267	284.77	207.763	440.799	479.287	942.078	600.832	279.975	94.6816	231.557	212.374	272.884	284.718		135.584	25.2823	360.976	65.9857
	8	138.433	160.047	92.4681	114.198		73.5667	195.678	75.1271	293.601	294.438	113.516	419.657	409.244	921.562	651.6	255.823	60.8532	231.277	203.669	197.057	239.944		142.89	26.2466	333.22	69.9094
	9	121.963	116.978	88.5526	92.9644		59.8978	232.855	68.2069	211.823	300.898	157.749	371.502	514.809	1094.52	678.63	298.087	98.6878	212.156	216.033	325.223	266.891		124.155	22.7789	377.932	79.309
	10	132.915	112.078	79.7015	86.455		71.1811	208.02	59.1069	233.718	274.951	130.802	458.522	533.096	1037.41	728.092	268.108	130.755	235.871	247.404	190.015	272.294		122.897	23.0225	375.61	78.6512
	11	135.733	103.184	93.8605	117.011		54.2562	204.016	48.822	319.372	261.774	186.457	426.346	506.324	1072.25	765.924	298.457	201.71	290.493	343.813	201.208	242.155		134.532	31.5463	399.742	77.4467
	12	151.883	119.119	130.326	105.098		75.1141	178.838	44.0181	315.837	278.418	157.443	382.643	495.978	1066.4	826.677	297.364	190.21	254.7	264.554	155.228	160.152		140.029	29.1972	377.48	83.2404
	13	132.881	139.953	110.819	142.606		74.4049	209.927	39.0872	277.733	228.893	146.635	421.076	569.048	938.327	831.966	290.4	176.308	299.076	294.873	201.891	234.318		140.926	26.4739	386.068	75.2037
	14	131.666	148.888	88.3733	159.227		61.0262	221.396	56.0807	304.596	267.781	185.535	349.586	568.009	1126.67	865.011	305.11	147.85	298.526	303.374	171.597	212.327		146.407	29.8363	400.114	87.8243
	15	141.268	155.517	88.1114	111.513		56.4806	229.51	22.0302	233.799	267.738	146.328	407.355	599.315	1031.96	810.161	275.176	103.195	266.508	323.207	241.276	234.005		129.779	26.9301	392.185	81.1207
	16	132.003	163.546	112.582	119.729		72.0515	249.327	52.3561	256.052	226.74	147.165	416.431	565.25	973.988	745.425	319.085	205.527	332.745	313.537	182.133	300.391		144.706	26.4989	394.035	71.9653
	17	104.141	171.699	124.371	137.33		75.6621	239.593	67.2546	292.118	245.3	148.031	399.226	648.501	1058.93	792.174	307.412	123.243	254.02	307.881	216.263	269.291		151.521	28.0211	397.522	82.7048
	18	108.563	148.476	135.758	130.662		75.7266	255.668	57.1811	232.431	191.728	146.914	375.911	632.633	1057.05	820.134	331.388	141.168	260.081	326.685	194.85	257.626		143.058	24.6414	394.68	83.893
	19	137.859	154.818	112.017	126.175		69.6982	271.672	72.651	289.055	206.327	134.795	358.64	595.048	1166.36	784.262	319.079	189.311	314.789	279.386	182.685	240.971		154.243	29.462	397.637	88.2384
	20	103.415	137.607	111.604	120.455		108.738	244.981	61.7099	337.926	254.323	153.616	385.654	623.376	1114.84	801.884	326.96	119.306	260.405	243.164	139.437	230.355		153.305	32.2985	387.777	88.2328
	21	130.958	139.501	168.171	119.444		73.2765	278.553	63.149	223.161	220.108	101.424	357.974	579.863	1073.55	763.738	337.04	171.024	260.405	338.007	144.56	251.71		149.527	25.7193	383.284	82.8111
	22	126.198	121.054	183.847	121.466		56.6418	265.248	74.1324	300.752	246.054	75.9844	377.545	629.493	1052.78	720.481	367.682	181.437	251.109	306.583	156.674	241.161		156.168	30.9203	383.915	81.265
	23	110.369	110.637	189.209	138.12		70.762	280.343	78.1109	330.742	235.783	118.29	377.567	587.74	1035.16	678.115	342.685	153.186	234.533	258.415	163.163	264.323		163.537	33.9212	370.747	77.7874
	24	119.532	147.2	190.216	114.957		87.2033	271.437	62.0062	327.322	247.11	150.684	467.705	614.347	964.27	702.105	302.983	191.936	240.993	223.728	143.352	233.403		164.984	32.6949	373.551	74.8745
	25	121.051	163.958	244.853	136.003		83.8183	275.036	92.4803	228.261	228.483	91.1198	435.917	601.873	1092.85	753.602	290.413	149.197	241.672	302.922	91.2241	202.649		168.182	25.7142	373.493	87.3516
	26	95.9227	139.253	275.474	132.622		94.1989	290.444	99.9084	272.961	202.494	101.061	448.349	562.134	1139.19	717.868	323.111	178.346	236.259	261.828	85.6803	245.882		175.098	31.2002	375.183	87.9283
	27	130.198	99.1075	216.453	140.774		86.3006	273.362	114.257	289.186	242.307	135.576	448.112	606.229	1046.68	675.1	296.461	211.57	268.87	270.028	86.3634	226.548		168.705	28.2244	376.153	79.5558
	28	94.6233	138.183	211.351	105.477		104.805	300.547	77.3914	317.694	273.81	128.344	425.916	628.517	984.729	711.073	307.665	204.801	214.949	226.154	52.0755	279.784		168.759	33.8689	369.818	78.6705
	29	89.4761	120.025	161.843	104.877		86.8486	312.286	73.561	310.07	158.812	131.193	444.821	586.942	942.759	695.398	312.887	152.512	257.752	202.049	49.0015	299.107		157.373	34.8705	352.77	77.0724
	30	89.6281	110.719	231.508	109.428		83.5282	290.363	117.177	239.712		178.191	382.857	559.551	943.612	618.604	338.672	188.863	244.239	192.218	7.39721	235.87		159.008	28.6837	353.643	79.2845
	31	103.821	115.825	223.925	103.36		83.0446	336.015	75.5926	296.5		141.664	417.356	561.83	883.542	639.391	321.517	195.303	245.339	215.357		244.398		167.261	36.5085	386.57	75.4859
	32	104.496	102.855	243.088	87.3082		102.323	321.812	87.6975	290.668		154.202	384.88	592.844	949.409	651.173	315.15	115.058	275.89	207.201		205.395		167.531	35.328	385.12	84.2875
	33	95.0789	134.148	191.347	94.7655		96.2621	301.851	97.2207	300.671		181.123	414.797	609.206	880.189	684.006	331.031	154.861	294.784	213.607		215.107		163.918	32.1581	397.871	78.0268
	34	81.2913	121.342	232.17	101.781		93.1028	300.051	118.256	228.635		144.122	372.577	573.075	838.447	631.202	295.576	146.089	279.579	224.351		230.289		159.579	28.9177	373.531	73.3633
	35	89.5605	113.89	150.496	93.2488		80.0787	289.095	54.2608	255.758		124.378	401.355	648.615	906.616	603.357	288.442	165.43	310.346	218.726		195.371		140.799	30.4982	386.264	80.5636
	36	95.754	109.525	197.689	103.834		95.2628	273.848	59.0858	255.742		137.335	433.616	613.967	783.265	558.353	322.753	165.032	273.55	215.7		236.762		148.843	28.8954	374.033	68.2242
	37	97.5766	120.56	181.627	102.065		91.91	268.379	64.8632	311.519		44.8199	410.366	650.895	715.693	536.234	300.915	146.21	262.583	213.393		221.503		154.813	32.0303	350.261	70.1178
	38	88.3792	109.772	184.481	93.6595		103.225	281.135	41.14	348.516		106.284	398.343	610.813	822.108	563.389	309.922	134.243	292.358	163.68		217.976		156.288	37.8213	361.912	74.5644
	39	89.3074	75.6382	215.185	95.3659		111.608	283.024	10.3696	371.158		82.3792	367.093	571.264	814.408	535.443	304.746	149.543	266.336	174.66		213.097		156.457	43.0304	347.897	72.2348
	40	78.2705	113.519	153.447	68.0328		92.6838	280.226	15.8507	270.142		113.153	436.067	625.06	755.617	518.072	304.583	119.41	261.537	153.463		233.48		134.021	33.7634	352.044	70.487
	41	81.9326	112.489	145.396	81.7151		97.2937	269.072	52.8429	346.039		83.1331	384.341	645.297	701.458	513.928	289.984	136.799	250.354	181.003		220.253		148.348	36.7252	340.655	67.7823
	42	76.431	119.613	163.801	67.2428		94.2634	249.884	29.4371	289.055		131.137	404.559	626.187	782.413	504.783	299.972	151.01	274.791	227.184		179.196		136.216	32.4065	358.123	69.0772
	43	87.0967	122.371	145.244	86.0757		104.483	260.679	46.3459	263.675		91.2315	345.693	618.994	705.663	528.209	319.813	154.792	254.161	193.892				139.496	28.6401	356.939	71.6599
	44	78.4562	111.295	167.937	80.4828		102.58	250.28	25.4374	328.006		93.298	353.255	272.864	357.887	568.39	482.622		254.757					143.059	35.58	340.439	58.885
	45	104.934	167.375	146.043	75.9009		98.2931	213.894	29.9873	287.997		110.333	332.169	295.689	420.713	578.146	499.787		248.585					140.553	29.0712	355.06	59.8213

## Sheet: Panel F
Source data Figure S3
Raw data					Statistics summary
	NMDAR EPSC				Wilcoxon test
					P value	0.1875
pair #	control	transfected			Exact or approximate P value?	Exact
1	69	99			P value summary	ns
2	6	10
3	7	6
4	74	84
5	17	17
6	62	63
mean	39.1667	46.5
sem	13.2298	16.6107
n	6	6
