# Supplementary material for: Long-term potentiation is independent of the C-tail of the GluA1 AMPA receptor subunit
Source: eLife. 2020 Aug 24;9:e58042. doi: 10.7554/eLife.58042 (PMC7500950; doi:10.7554/eLife.58042)
Supplement: Figure 1—source data 1. — GluA1/A2CTD supports LTP. [file elife-58042-fig1-data1.xlsx]

## Sheet: Panel B
Source data Figure 1
AMPAR EPSC					Statistics summary
pair #	control	transfected			Wilcoxon test
1	165	66			P value	0.804
2	130	34			P value summary	ns
3	41	41
4	216	81
5	59	116
6	54	75
7	46	52
8	22	31
9	70	78
10	34	162
11	104	118
12	39	52
13	77	78
14	80	57
15	34	22
16	74	90
mean	77.8125	72.0625
sem	13.2187	9.19351
n	16	16

## Sheet: Panel C
Source data Figure 1
LTP Experiment
		AMPAR replacement with GluA1/A2CTD + GluA2(R)																	Control														GluA1 replacement with GluA1/A2CTD average	GluA1 replacement with GluA1/A2CTD SEM	Control average	Control SEM		Statistics summary (min 45)
	Cell #	1	2	3	4	5	6	7	8	9	10	11	12	13	14	15	16	17	1	2	3	4	5	6	7	8	9	10	11	12	13							Unpaired t-test
	Time (min)																																					P value	0.7745
Baseline	-3	117.711			56.9246	61.2068	77.0737		98.5361	91.1668	81.2959	104.583		76.2539	80.5514	87.9692	82.075	86.6733			62.7935	107.531		75.8871	74.464	76.9892		96.7519	60.0985	69.1538	74.132		84.7708	4.54423	77.5335	3.32515		P value summary	ns
	-2	126.925	93.509	94.2773	85.5619	94.0673	97.1322	104.125	106.601	95.1301	113.359	96.879	98.6926	93.1173	97.8364	126.717	104.325	98.7014	94.827	143.634	108.508	80.2506	98.3438	87.6352	107.706	121.228	110.585	93.0668	80.6112	128.56	110.791		101.586	2.7583	105.058	3.47439		Significantly different (P < 0.05)?	No
	-1	55.3639	106.491	105.723	157.514	144.726	125.794	95.8749	94.863	113.703	105.345	98.5385	101.307	130.629	121.612	85.3137	113.6	114.625	105.173	56.3656	128.698	112.218	101.656	136.478	117.83	101.782	89.4148	110.181	159.29	102.286	115.077		110.06	5.62415	110.496	4.5053
Pairing	0
	1
Post pairing	2	162.791	121.461	155.3	52.4406	205.061	259.865	285.308	225.685	329.099	437.809	263.458	21.3652	234.623	77.9073	403.192	118.006	213.045	69.7576	245.828	174.253	220.335	143.864	204.779	1080.89	300.322	43.3777	274.273	90.8071	562.584	163.033		209.789	28.0942	274.931	50.6779
	3	548.872	258.755	425.775	88.7123	282.836	233.429	176.235	218.872	251.369	255.497	187.899	38.0001	173.913	63.138	229.61	156.715	219.638	170.257	248.267	175.656	186.167	85.7238	249.952	426.717	178.728	76.4982	202.807	81.8455	392.196	195.918		224.074	29.8419	205.441	21.1346
	4	446.301	396.551	494.554	112.74	292.743	232.478	126.787	274.208	231.419	189.966	142.737	44.3992	227.223	84.5682	139.471	188.607	217.608	268.476	236.224	281.624	226.32	137.365	297.385	383.138	182.134	59.2127	189.682	145.199	345.401	207.505		226.021	30.2826	227.667	18.9303
	5	357.91	327.114	575.559	121.358	299.3	224.923	182.716	365.797	245.419	215.659	175.571	37.2118	239.95	95.2229	220.073	195.175	230.846	251.408	237.428	252.252	131.456	97.8116	308.773	445.521	192.254	97.4615	253.32	165.086	373.961	245.123		241.753	29.7237	234.758	20.6442
	6	297.069	244.431	566.77	168.79	255.948	244.598	117.49	359.276	246.587	243.796	135.079	57.828	242.628	118.824	169.954	198.991	217.608	176.077	227.746	331.747	188.575	103.479	319.317	439.102	180.456	123.761	248.671	194.59	241.749	246.05		228.569	27.6831	232.409	18.6416
	7	371.624	257.198	467.744	151.913	263.649	297.021	153.505	383.578	206.81	211.687	138.72	50.1413	211.343	125.069	283.319	203.557	215.811	202.219	268.905	280.72	142.24	100.428	300.374	294.968	168.856	94.6816	231.557	212.374	272.884	284.718		234.864	25.3456	219.61	16.0494
	8	281.277	251.88		157.605	358.702	306.508	161.307	499.229	211.941	198.214	136.69	52.5196	209.585	169.432	248.236	194.397	228.972	196.695	280.697	354.01	222.905	103.954	349.452	350.257	162.492	60.8532	231.277	203.669	197.057	239.944		229.156	25.4286	227.174	18.0285
	9	282.55	221.677		152.146	292.011	323.053	122.769	345.649	176.333	216.01	144.927	50.2464	218.459	152.048	176.2	188.982	238.926	218.473	238.375	409.886	253.872	74.6269	314.543	278.247	179.21	98.6878	212.156	216.033	325.223	266.891		206.374	19.4539	237.402	18.3887
	10	290.243	211.928		156.697	335.01	322.896	146.32	497.445	193.251	241.368	143.447	38.4863	247.551	167.072	189.44	200.465	257.387	209.199	243.092	336.44	206.225	72.4075	312.563	329.369	159.4	130.755	235.871	247.404	190.015	272.294		227.438	25.8678	226.541	16.6767
	11	341.59	254.778		176.999	344.999	319.298	105.758	490.818	176.987	255.925	154.295	116.274	264.564	171.241	191.759	195.237	247.368	249.583	214.62	378.736	199.809	43.7536	323.187	320.868	173.244	201.71	290.493	343.813	201.208	242.155		237.993	24.94	244.86	17.1638
	12	294.649	236.862		180.008	315.963	308.315	144.883	499.495	193.794	289.653	149.031	92.8717	241.335	218.202	149.607	213.851	231.57	226.463	252.12	442.844	213.019	70.307	307.314	370.696	206.397	190.21	254.7	264.554	155.228	160.152		235.006	23.8872	239.539	18.7013
	13	335.82	231.88		210.063	307.189	274.852	146.086	489.38	162.527	311.955	130.496	85.185	292.027	195.043	184.579	197.802	260.244	204.883	209.605	386.532	194.112	96.147	306.515	329.876	188.3	176.308	299.076	294.873	201.891	234.318		238.445	24.4926	240.187	17.0117
	14	300.947	257.485		196.077	315.551	396.973	189.99	479.426	191.315	292.922	150.076	51.6654	289.803	191.88	140.78	172.005	263.036	210.506	216.287	355.803	170.944	75.8159	330.289	394.905	187.485	147.85	298.526	303.374	171.597	212.327		242.496	26.1841	236.593	19.5737
	15	370.04	227.186		204.087	239.391	376.658	185.356	408.278	195.237	298.758	145.188	74.7782	234.38	228.227	109.4	172.737	276.571	181.503	201.846	283.978	165.372	97.8116	334.645	410.896	150.094	103.195	266.508	323.207	241.276	234.005		234.142	23.5077	230.334	19.265
	16	350.774	306.563		214.438	326.99	364.039	174.651	621.8	215.555	304.699	172.859	50.7457	255.223	179.429	112.766	155.357	236.392	174.166	193.246	270.727	163.772	100.982	296.69	454.642	172.678	205.527	332.745	313.537	182.133	300.391		252.643	32.9246	243.172	20.2563
	17	337.464	304.766		219.531	261.585	385.024	166.879	497.898	195.524	283.359	157.878	63.0051	258.367	255.782	78.8805	183.398	248.686	203.946	215.509	321.723	161.562	91.0742	366.598	480.597	174.938	123.243	254.02	307.881	216.263	269.291		243.627	27.3109	245.127	21.805
	18	396.66	226.179		212.012	279.322	391.271	245.568	482.433		330.316	178.588	70.6787	261.854	204.103	134.871	193.075	260.347	179.024	190.376	296.715	129.767	116.597	339.255	511.733	183.414	141.168	260.081	326.685	194.85	257.626		257.819	27.6044	240.561	21.6043
	19	443.354	351.569		213.087	329.632	414.872	170.633	558.292		312.627	182.228	67.2887	245.469	272.24	108.466	196.069	303.757	228.028	217.182	322.689	170.351	84.8123	332.281	475.925	204.12	189.311	314.789	279.386	182.685	240.971		277.972	33.8371	249.425	20.5367
	20	383.196	313.341		203.453	243.754	371.642	203.745	562.443		319.425	176.413	77.0778	244.327	283.123	79.1423	200.224	264.419	245.391		280.938	152.952	110.057	314.115	528.905	190.21	119.306	260.405	243.164		230.355		261.715	31.5928	243.254	23.9692
	21	473.79	323.761		217.813	311.742	352.029	185.034	590.365		286.873	183.301	56.4484	248.694	209.182	83.2191	182.63	284.766	247.315		267.157	173.82	72.6453	294.685	497.15	188.565	171.024	260.405	338.007		251.71		265.976	35.5583	251.135	23.3357
	22	422.97	345.413		211.779	273.661	364.305	227.736	559.037		286.919	178.559	60.6136	246.136	218.846	59.0575	174.775	302.478	203.033		274.578	181.297	100.031	306.224	475.7	175.57	181.437	251.109	306.583		241.161		262.152	33.5293	245.157	22.3789
	23	374.602	331.616		203.703	281.315	383.559	175.091	621.774		249.035	176.094	58.2222	271.487	159.795	66.4257	164.579	297.293	172.551		283.885	207.664	137.8	297.779	520.854	180.023	153.186	234.533	258.415		264.323		254.306	36.5651	246.456	23.4041
	24	338.675	248.767		210.155	336.013	399.263	233.103	543.599		265.976	170.147	61.7305	285.851	204.062	39.5337	181.083	283.926	118.306		331.062	199.826	147.471	257.576	486.566	205.067	191.936	240.993	223.728		233.403		253.459	32.4482	239.63	22.6029
	25	352.605	287.545		234.624	326.683	376.393	209.025	454.938		253.496	168.624	69.207	232.429	184.146	27.3408	184.283	279.492	99.3156		316.796		96.9397	311.484	501.317	210.734	149.197	241.672	302.922		202.649		242.722	28.9207	243.303	26.0903
	26	325.023	244.219		214.68	312.956	392.47	247.151	546.154		261.561	178.66	65.0812	274.46	217.237	32.0908	181.727	273.507	100.448		325.261		154.327	282.752	508.749	176.152	178.346	236.259	261.828		245.882		251.132	31.822	247	25.1392
	27				217.822	276.763	359.397	184.476	551.877		272.575	169.915	100.335	229.862	215.133	13.8761	183.469	281.949			261.622		97.8512	306.688	534.704	195.545	211.57	268.87	270.028		226.548		235.188	35.6655	263.714	26.8155
	28				182.683	285.148	383.17	263.869	620.069		251.281	176.963	69.667	245.317	246.159	27.9766	200.769	278.949			263.883		87.4281	313.64	594.667	187.336	204.801	214.949	226.154		279.784		248.617	40.1175	263.627	29.7084
	29				167.631	288.191	301.912	207.704	472.185		276.455	163.258	36.8307	269.294	230.264	35.7562	198.32	272.692					160.113	289.286	541.123	197.29	152.512	257.752	202.049		299.107		224.653	31.7497	262.404	29.1567
	30				132.485	317.261	350.097	229.672	495.502		244.514	148.292	79.0618	210.11	229.152	17.2106	212.135	252.939					118.42	321.448	636.724	178.196	188.863	244.239	192.218		235.87		224.495	33.7634	264.497	33.3322
	31				197.011	261.373	250.222	315.574	475.273		256.322	136.588	95.6179	208.563	225.962		206.783	349.224					136.809	331.875	554.86	202.193	195.303	245.339	215.357		244.398		248.209	28.6952	265.767	28.3122
	32				188.21	243.86	233.959	242.576	522.519		254.948	150.931	91.7154	217.874	223.603		220.687	312.173					107.006	302.042	530.2	169.704	115.058	275.89	207.201		205.395		241.921	30.025	239.062	27.8818
	33				192.185	256.703	211.292	207.734	492.813		243.78		60.9421	229.205	205.216		229.667	298.742					116.399	283.296	523.557	180.39	154.861	294.784	213.607		215.107		238.934	30.9387	247.75	28.59
	34				186.9	264.84	175.259	231.813	555.683		264.57		102.07	225.142	176.802		220.365	257.696					97.8116	324.241	581.717	166.879	146.089	279.579	224.351		230.289		241.922	34.6216	256.369	31.8323
	35				195.344	288.179	206.042	215.066	496.434		245.965		93.1214	203.085	226.31		225.432	312.458					128.169	317.532	617.863	204.984	165.43	310.346	218.726		195.371		246.13	30.1596	269.803	33.4232
	36				188.534	261.385	175.259	219.436	500.133		257.116		107.129	194.21	209.209		205.227	302.788					139.703	313.802	571.301	157.041	165.032	273.55	215.7		236.762		238.221	30.3762	259.111	30.1671
	37				169.723	224.684	161.518	227.736	475.353		256.429		64.5687	165.402	148.872		231.276	302.671					123.89	311.937	570.062	183.813	146.21	262.583	213.393		221.503		220.748	31.8686	254.174	32.1621
	38				166.589	217.644	239.256	221.841	544.291		275.111		94.0543	191.025	181.574		216.558	312.884					170.536	345.686	624.282	181.736	134.243	292.358	163.68		217.976		241.893	34.7693	266.312	34.8765
	39				194.286	235.003	215.482	257.182	453.315		276.746		91.7417	210.687	176.239		244.536	317.603					195.583	307.012	553.227	189.563	149.543	266.336	174.66		213.097		242.984	27.4217	256.128	29.2097
	40				186.876	232.786	255.411	247.944	448.31		255.895		51.4027	211.505	173.921		256.358	289.951					169.823	347.992	558.858	185.375	119.41	261.537	153.463		233.48		237.305	28.6437	253.742	32.0499
	41				174.658	239.331	256.112	281.554	371.387		273.568		89.7576	234.31	184.509		238.593	275.446					161.143	338.247	616.061	178.828	136.799	250.354	181.003		220.253		238.111	21.6479	260.336	33.4555
	42				178.966	205.484	214.36	325.282	469.817		260.432		76.6309	205.673	192.791		203.057	307.571					125.791	358.813	606.94	150.011	151.01	274.791	227.184		179.196		240.006	30.4672	259.217	34.7063
	43				199.903	202.796	190.027	245.626	497.019		258.308		88.391	190.046	145.16		180.734	309.497					150.721	340.136	524.401	137.997	154.792	254.161	193.892				227.955	32.0705	250.871	31.9452
	44				199.494	214.377	209.967	200.578	442.215		215.369		134.472	220.026	196.142			275.343					128.209	251.979	522.937	143.198	107.045	245.662	185.746				230.798	25.8439	226.397	31.7018
	45				183.5	181.592	226.933	251.58	396.487		213.077		96.5509	213.658	154.943			286.796					168.079	230.303	527.723	162.541	148.696	244.477	167.791				220.512	25.6081	235.659	31.7631

## Sheet: Panel E
Source data Figure 1
Raw data					Statistics summary
	AMPAR EPSC				Wilcoxon test
pair #	control	transfected			P value	0.5566
1	40	41			P value summary	ns
2	78	39
3	241	236
4	28	37
5	27	60
6	18	93
7	57	57
8	79	79
9	20	78
10	71	19
11	32	46
12	50	38
mean	61.75	68.5833
sem	17.473	16.4148
n	12	12

## Sheet: Panel F
Source data Figure 1
LTP Experiment
		GluA1 replacement with GluA1/A2CTD											Control									GluA1 replacement with GluA1/A2CTD Average	GluA1 replacement with GluA1/A2CTD SEM	Control Average	Control SEM		Statistics summary (min 45)
	Cell #	1	2	3	4	5	6	7	8	9	10	11	1	2	3	4	5	6	7	8							Unpaired t-test
	Time (min)																										P value	0.6829
Baseline	-3	88.6121	76.6626	76.8635	99.1589	86.1531			73.5988	79.543	98.0143	92.2955	86.9771	69.951	83.7509		100.51	75.045	124.071			85.6558	3.1821	90.0509	5.97693		P value summary	ns
	-2	91.5704	96.1199	71.325	96.4882	114.251	106.834	75.3425	101.623	107.383	99.1968	99.1685	82.8027	113.999	101.201	89.091	80.6475	84.6321	72.5601	88.0414		96.3002	3.91546	89.1219	3.8501		Significantly different (P < 0.05)?	No
	-1	119.817	127.218	151.811	104.353	99.5961	93.1656	124.658	124.779	113.074	102.789	108.536	130.22	116.05	115.048	110.909	118.843	140.323	103.369	111.959		115.436	4.98757	118.34	3.70356
Pairing	0
	1
Post pairing	2	172.083	440.038	489.821	204.149	189.349	530.175	408.189	297.149	193.276	205.726	90.0929	320.487	341.129	731.887	131.429	424.767	163.413	71.1718	261.314		292.732	44.9128	305.7	62.4854
	3	150.087	298.326	457.292	220.321	172.145	279.892	230.105	169.691	377.378	174.034	151.897	202.646	430.451	999.791	55.7864	226.007	166.344	168.844	179.589		243.742	30.3253	303.682	85.8099
	4	145.524	293.115	494.655	247.272	219.42	186.528	203.316	151.974	532.984	237.437	230.579	278.68	417.41	818.82	52.0347	411.996	188.928	275.276	155.543		267.528	38.9201	324.836	66.6291
	5	165.648	257.14	722.571	293.851	281.536	117.69	185.334	203.565	623.596	278.247	281.636	401.112	559.006	904.249	94.5744	204.721	211.716	249.49	150.291		310.074	57.1223	346.895	75.7221
	6	194.147	268.649	629.126	257.416	276.932	235.924	169.933	183.369	692.862	277.547	236.206	333.112	497.749	737.246	83.9828	279.894	212.313	280.625	152.01		311.101	53.5165	322.116	58.8944
	7	200.582	259.433	624.134	253.153	161.045	154.75	206.589	200.126	623.637	296.342	239.257	361.721	516.429	777.341	79.3362	302.276	251.63	262.413	218.761		292.641	50.9672	346.238	60.7294
	8	214.031	284.257	549.94	267.854	254.219	239.279	222.089	173.49	606.057	265.151	244.804	288.23	308.738	804.794	99.7688	118.721	228.009	341.466	290.498		301.925	42.3074	310.028	61.394
	9	257.444	264.712	649.413	341.605	250.005	148.926	191.101	135.016	609.035	226.5	269.642	316.06	427.999	804.192	70.736	328.186	247.988	334.116	316.033		303.945	51.6045	355.664	59.9072
	10	277.6	259.756	715.029	332.293	313.827	210.166	263.019	168.091	580.66	264.391	325.582	451.323	457.401	845.37	106.898	222.966	283.595	351.163	347.107		337.31	49.3431	383.228	62.5696
	11	266.432	287.163	661.124	256.608	335.842	235.184	164.288	203.725	558.745	293.963	315.55	375.535	367.922	1051.81	93.7952	172.972	257.471	315.006	333.279		325.33	45.42	370.973	81.9404
	12	293.33	250.818	590.755	265.796	347.928	199.161	210.319	228.081	305.257	340.31	316.214	366.763	366.117	930.437	89.2642	92.2033	267.99	341.996	312.996		304.361	32.4119	345.971	73.0838
	13	291.05	237.491	727.457	334.107	314.485	181.101	246.396	198.126		278.987	410.075	402.751	322.069	881.732	59.4806	94.2711	247.808	393.916	266.356		321.927	49.8017	333.548	71.6542
	14	305.112	247.171	782.398	282.359	303.201	192.795	222.386	219.162		325.454	433.694	304.461	332.947	770.478	81.876	107.652	263.593	370.131	322.297		331.373	54.6277	319.179	59.863
	15	282.265	278.954	827.992	263.321	283.735	138.91	231.266	182.168		306.3	382.689	367.87	353.143	789.742	86.7533	107.165	255.137	381.421	315.212		317.76	60.5002	332.055	60.8966
	16	281.447	275.828	842.411	285.226	436.23	160.227	188.396	169.251		335.132	413.738	332.292	359.675	862.768	67.648	191.948	220.578	350.265	268.781		338.789	63.4321	331.745	66.2258
	17	323.872	272.597	731.466	287.308	520.38	221.219	188.928	202.286		341.131	416.524	347.498	323.05	1181.31	91.8904	137.575	228.132	334.565	284.309		350.571	53.1245	366.041	95.6845
	18	328.946	252.196	899.874	280.497	447.001	170.145	192.115	201.605		286.584	514.339	316.225	325.814	1148.73	85.0506	93.1764	199.369	410.514	283.392		357.33	69.6338	357.784	96.3219
	19	347.06	265.407	795.356	374.633	509.775	232.519	182.049	174.651		279.687	524.476	485.711	418.97	1136.57	99.1057	133.318	223.081	467.272	327.435		368.561	61.1318	411.433	93.2168
	20	259.453	240.524	719.703	351.307	428.255	213.719	190.497	179.049		280.467	515.905	432.017	441.062	1033.32	59.8269	143.17	226.215	442.486	310.895		337.888	54.4793	386.124	85.1039
	21	302.864	269.089	765.642	396.415	424.535	201.086		199.206		348.748	498.523	427.836	462.395	1318.93	112.669	273.326	215.448	444.14	243.456		378.456	58.7986	437.275	105.863
	22	290.028	287.337	838.135	388.746	377.609	229.706		201.925		313.417	475.568	452.921	419.26	951.809	76.4214	76.755	226.701	484.279	288.148		378.053	63.9534	372.037	79.8749
	23	272.05	277.101	912.461	311.345	460.567	157.464		230.201		361.285	549.687	470.669	338.699	1223.81	91.1111	194.26	247.571	457.064	336.985		392.462	76.0728	420.021	98.4419
	24	326.358	281.536	892.12	447.33	421.431	293.067		194.926		310.759	583.654	468.169	464.49	1116.46	109.87	191.34	283.99	475.888	306.751		416.798	70.4136	427.12	88.8038
	25	269.769	289.768	707.328	342.364	424	230.397		226.002		357.966	465.298	490.261	421.69	1291.72	86.7533	36.857	274.225	451.857	278.427		368.099	50.4661	416.474	109.071
	26	306.405	249.313	786.566	300.54	380.65	256.156		200.926		285.065	578.081	421.4	499.153	1227.18	114.488	59.9686	294.724	492.588	281.177		371.522	63.3676	423.835	103.489
	27	295.919	251.872	669.728	372.771	463.815	229.312		198.566		334.972	571.844	617.366	481.432	1257.52	139.625	116.531	236.386	549.713	266.451		376.533	53.8587	458.128	105.696
	28	309.878	261.309	734.52	272.46	430.331	318.085		187.408		242.716	559.159	469.07	473.741	1167.39	65.9453	107.773	220.375	506.41	267.75		368.43	58.861	409.807	100.366
	29	351.214	268.777	670.152	355.277	428.111	257.094		178.09		280.646	660.929	488.868	368.123	979.924	92.4676	110.327	242.035	470.518	219.239		383.365	58.3188	371.438	86.145
	30	354.278	269.807	718.428	332.367	463.547	235.875		195.087		316.177	567.095	581.788	332.88	1123.51	110.794	63.4962	250.57	478.971	191.869		383.629	56.5822	391.734	98.0187
	31	352.167	258.749	719.995	357.457	374.114	365.754		180.409		288.264	620.116	501.615	434.686	1117.42	136.017	70.4297	238.348	491.874	212.993		390.78	57.3343	400.423	96.2496
	32	297.416	238.741	701.858	317.886	453.002	236.911		204.885		276.887	569.933	457.348	445.542	1231.39	112.756	177.351	231.707	512.413	195.613		366.391	57.2197	420.515	102.793
	33	226.595	212.33	572.751	275.89	526.341	268.542		204.645		287.544	509.828	541.21	372.336	1192.44	131.314	67.5103	264.991	470.09	219.239		342.719	49.5984	407.391	100.643
	34	187.167	226.561	748.275	259.278	377.588	202.616		169.331		340.69	472.41	470.136	473.964	852.173	124.185	127.236	204.646	466.782	179.168		331.546	61.8843	362.286	71.2699
	35	154.513	228.564	901.786	290.837	401.493	176.857		161.932		308.718	534.507	503.992	520.71	913.942	124.185	74.5655	193.675	419.886	151.895		351.023	80.3349	362.856	81.3771
	36	150.292	219.439	823.211	297.771	358.657	298.693		202.485		290.324	575.825	442.304	489.166	996.299	175.959	54.6165	213.204	483.34	175.75		357.411	70.9184	378.83	86.204
	37	128.16	239.957	845.544	270.941	447.74	299.581		211.963		265.91	611.411	531.536	499.599	1097.98	110.765	81.8638	240.704	492.486	175.559		369.023	76.0515	403.811	96.9007
	38	177.939	205.812	730.617	268.172	433.291	218.308		169.491		309.918	592.331	410.416	532.523	1157.52	130.794	120.91	215.571	471.376	178.806		345.098	66.556	402.24	98.5208
	39	200.139	151.461	840.976	230.758	476.353	374.834		196.486		325.815	570.863	407.588	526.059	1155.65	142.511	79.796	191.961	490.608	185.472		374.187	74.666	397.456	99.2986
	40	161.732	127.609	841.667	217.895	397.279	283.148		243.438		243.775	563.618	434.804	560.656	1040.49	160.462	69.2133	190.89	423.642	175.788		342.24	76.242	381.993	91.1599
	41	192.273	129.485	890.819	228.676	377.176	338.318		170.97		275.748	549.899	400.251	474.633	1118.76	153.103	106.435	222.202	457.88	168.072		350.374	79.853	387.666	94.0122
	42	220.33	120.801	811.847	187.929	427.844	371.528		163.732		278.467	589.12	438.657	408.159	1117.01	129.813	180.879	180.584	467.211	180.658		352.4	75.6801	387.871	93.5652
	43	155.672	129.311	804.704	201.674	452.571	314.483		156.133		282.405	530.712	390.373	420.019	1079.8	137.172	96.5824	193.484	488.015	145.592		336.407	74.5498	368.88	92.1495
	44	94.9621	122.503	792.037	212.553	454.996	321.786		161.412		279.727	587.05	325.939	463.42	1054.21	162.078	172.729	235.507	454.409	172.752		336.336	77.9889	380.131	86.6683
	45	115.051	108.933	842.198	234.311	420.588	299.186		163.092		287.844	548.385	381.273	443.492	1226.33	120.982	97.0689	187.407	470.641	154.263		335.51	79.3014	385.182	105.366
		100	100	100	100	100	100	100	100	100	100	100	100	100	100	100	100	100	100	100		99.1307	4.02838	99.1709	4.51019
		88.6121	76.6626	76.8635	99.1589	86.1531			73.5988	79.543	98.0143	92.2955	86.9771	69.951	83.7509		100.51	75.045	124.071
		91.5704	96.1199	71.325	96.4882	114.251	106.834	75.3425	101.623	107.383	99.1968	99.1685	82.8027	113.999	101.201	89.091	80.6475	84.6321	72.5601	88.0414
		119.817	127.218	151.811	104.353	99.5961	93.1656	124.658	124.779	113.074	102.789	108.536	130.22	116.05	115.048	110.909	118.843	140.323	103.369	111.959
		0	0	0	0	0	0	0	0	0	0	0	0	0	0	0	0	0	0	0
		0	0	0	0	0	0	0	0	0	0	0	0	0	0	0	0	0	0	0
		172.083	440.038	489.821	204.149	189.349	530.175	408.189	297.149	193.276	205.726	90.0929	320.487	341.129	731.887	131.429	424.767	163.413	71.1718	261.314
		150.087	298.326	457.292	220.321	172.145	279.892	230.105	169.691	377.378	174.034	151.897	202.646	430.451	999.791	55.7864	226.007	166.344	168.844	179.589
		145.524	293.115	494.655	247.272	219.42	186.528	203.316	151.974	532.984	237.437	230.579	278.68	417.41	818.82	52.0347	411.996	188.928	275.276	155.543
		165.648	257.14	722.571	293.851	281.536	117.69	185.334	203.565	623.596	278.247	281.636	401.112	559.006	904.249	94.5744	204.721	211.716	249.49	150.291
		194.147	268.649	629.126	257.416	276.932	235.924	169.933	183.369	692.862	277.547	236.206	333.112	497.749	737.246	83.9828	279.894	212.313	280.625	152.01
		200.582	259.433	624.134	253.153	161.045	154.75	206.589	200.126	623.637	296.342	239.257	361.721	516.429	777.341	79.3362	302.276	251.63	262.413	218.761
		214.031	284.257	549.94	267.854	254.219	239.279	222.089	173.49	606.057	265.151	244.804	288.23	308.738	804.794	99.7688	118.721	228.009	341.466	290.498
		257.444	264.712	649.413	341.605	250.005	148.926	191.101	135.016	609.035	226.5	269.642	316.06	427.999	804.192	70.736	328.186	247.988	334.116	316.033
		277.6	259.756	715.029	332.293	313.827	210.166	263.019	168.091	580.66	264.391	325.582	451.323	457.401	845.37	106.898	222.966	283.595	351.163	347.107
		266.432	287.163	661.124	256.608	335.842	235.184	164.288	203.725	558.745	293.963	315.55	375.535	367.922	1051.81	93.7952	172.972	257.471	315.006	333.279
		293.33	250.818	590.755	265.796	347.928	199.161	210.319	228.081	305.257	340.31	316.214	366.763	366.117	930.437	89.2642	92.2033	267.99	341.996	312.996
		291.05	237.491	727.457	334.107	314.485	181.101	246.396	198.126	0	278.987	410.075	402.751	322.069	881.732	59.4806	94.2711	247.808	393.916	266.356
		305.112	247.171	782.398	282.359	303.201	192.795	222.386	219.162	0	325.454	433.694	304.461	332.947	770.478	81.876	107.652	263.593	370.131	322.297
		282.265	278.954	827.992	263.321	283.735	138.91	231.266	182.168	0	306.3	382.689	367.87	353.143	789.742	86.7533	107.165	255.137	381.421	315.212
		281.447	275.828	842.411	285.226	436.23	160.227	188.396	169.251	0	335.132	413.738	332.292	359.675	862.768	67.648	191.948	220.578	350.265	268.781
		323.872	272.597	731.466	287.308	520.38	221.219	188.928	202.286	0	341.131	416.524	347.498	323.05	1181.31	91.8904	137.575	228.132	334.565	284.309
		328.946	252.196	899.874	280.497	447.001	170.145	192.115	201.605	0	286.584	514.339	316.225	325.814	1148.73	85.0506	93.1764	199.369	410.514	283.392
		347.06	265.407	795.356	374.633	509.775	232.519	182.049	174.651	0	279.687	524.476	485.711	418.97	1136.57	99.1057	133.318	223.081	467.272	327.435
		259.453	240.524	719.703	351.307	428.255	213.719	190.497	179.049	0	280.467	515.905	432.017	441.062	1033.32	59.8269	143.17	226.215	442.486	310.895
		302.864	269.089	765.642	396.415	424.535	201.086	0	199.206	0	348.748	498.523	427.836	462.395	1318.93	112.669	273.326	215.448	444.14	243.456
		290.028	287.337	838.135	388.746	377.609	229.706	0	201.925	0	313.417	475.568	452.921	419.26	951.809	76.4214	76.755	226.701	484.279	288.148
		272.05	277.101	912.461	311.345	460.567	157.464	0	230.201	0	361.285	549.687	470.669	338.699	1223.81	91.1111	194.26	247.571	457.064	336.985
		326.358	281.536	892.12	447.33	421.431	293.067	0	194.926	0	310.759	583.654	468.169	464.49	1116.46	109.87	191.34	283.99	475.888	306.751
		269.769	289.768	707.328	342.364	424	230.397	0	226.002	0	357.966	465.298	490.261	421.69	1291.72	86.7533	36.857	274.225	451.857	278.427
		306.405	249.313	786.566	300.54	380.65	256.156	0	200.926	0	285.065	578.081	421.4	499.153	1227.18	114.488	59.9686	294.724	492.588	281.177
		295.919	251.872	669.728	372.771	463.815	229.312	0	198.566	0	334.972	571.844	617.366	481.432	1257.52	139.625	116.531	236.386	549.713	266.451
		309.878	261.309	734.52	272.46	430.331	318.085	0	187.408	0	242.716	559.159	469.07	473.741	1167.39	65.9453	107.773	220.375	506.41	267.75
		351.214	268.777	670.152	355.277	428.111	257.094	0	178.09	0	280.646	660.929	488.868	368.123	979.924	92.4676	110.327	242.035	470.518	219.239
		354.278	269.807	718.428	332.367	463.547	235.875	0	195.087	0	316.177	567.095	581.788	332.88	1123.51	110.794	63.4962	250.57	478.971	191.869
		352.167	258.749	719.995	357.457	374.114	365.754	0	180.409	0	288.264	620.116	501.615	434.686	1117.42	136.017	70.4297	238.348	491.874	212.993
		297.416	238.741	701.858	317.886	453.002	236.911	0	204.885	0	276.887	569.933	457.348	445.542	1231.39	112.756	177.351	231.707	512.413	195.613
		226.595	212.33	572.751	275.89	526.341	268.542	0	204.645	0	287.544	509.828	541.21	372.336	1192.44	131.314	67.5103	264.991	470.09	219.239
		187.167	226.561	748.275	259.278	377.588	202.616	0	169.331	0	340.69	472.41	470.136	473.964	852.173	124.185	127.236	204.646	466.782	179.168
		154.513	228.564	901.786	290.837	401.493	176.857	0	161.932	0	308.718	534.507	503.992	520.71	913.942	124.185	74.5655	193.675	419.886	151.895
		150.292	219.439	823.211	297.771	358.657	298.693	0	202.485	0	290.324	575.825	442.304	489.166	996.299	175.959	54.6165	213.204	483.34	175.75
		128.16	239.957	845.544	270.941	447.74	299.581	0	211.963	0	265.91	611.411	531.536	499.599	1097.98	110.765	81.8638	240.704	492.486	175.559
		177.939	205.812	730.617	268.172	433.291	218.308	0	169.491	0	309.918	592.331	410.416	532.523	1157.52	130.794	120.91	215.571	471.376	178.806
		200.139	151.461	840.976	230.758	476.353	374.834	0	196.486	0	325.815	570.863	407.588	526.059	1155.65	142.511	79.796	191.961	490.608	185.472
		161.732	127.609	841.667	217.895	397.279	283.148	0	243.438	0	243.775	563.618	434.804	560.656	1040.49	160.462	69.2133	190.89	423.642	175.788
		192.273	129.485	890.819	228.676	377.176	338.318	0	170.97	0	275.748	549.899	400.251	474.633	1118.76	153.103	106.435	222.202	457.88	168.072
		220.33	120.801	811.847	187.929	427.844	371.528	0	163.732	0	278.467	589.12	438.657	408.159	1117.01	129.813	180.879	180.584	467.211	180.658
		155.672	129.311	804.704	201.674	452.571	314.483	0	156.133	0	282.405	530.712	390.373	420.019	1079.8	137.172	96.5824	193.484	488.015	145.592
		94.9621	122.503	792.037	212.553	454.996	321.786	0	161.412	0	279.727	587.05	325.939	463.42	1054.21	162.078	172.729	235.507	454.409	172.752
		115.051	108.933	842.198	234.311	420.588	299.186	0	163.092	0	287.844	548.385	381.273	443.492	1226.33	120.982	97.0689	187.407	470.641	154.263
		100	100	100	100	100	100	100	100	100	100	100	100	100	100	100	100	100	100	100
