# Supplementary material for: Long-term potentiation is independent of the C-tail of the GluA1 AMPA receptor subunit
Source: eLife. 2020 Aug 24;9:e58042. doi: 10.7554/eLife.58042 (PMC7500950; doi:10.7554/eLife.58042)
Supplement: Figure 2—source data 1. — GluA1 CTD is not required for AMPAR trafficking and LTP. [file elife-58042-fig2-data1.xlsx]

## Sheet: Panel D
Source data Figure 2
				Statistics summary
				T-test
Genotype	outside-out patch #	pA		P value	0.8197
WT	1	94		P value summary	ns
	2	186		Significantly different (P < 0.05)?	No
	3	167
	4	149
	5	99
	6	51
HA ΔCTD GluA1 KI	1	207
	2	87
	3	92
	4	86
	5	112
	6	119
	7	125

## Sheet: Panel E
Source data Figure 2
							Statistics summary
							T-test
Genotype	cell#	AMPAR EPSC	NMDAR EPSC	AMPA/NMDA ratio			P value	0.3774
WT	1	122	36	3.38889			P value summary	ns
	2	87	18	4.83333			Significantly different (P < 0.05)?	No
	3	85	44	1.93182
	4	62	21	2.95238
	5	73	23	3.17391
	6	52	11	4.72727
	7	79	16	4.9375
	8	87	18	4.83333
	9	77	26	2.96154
	10	117	89	1.31461
	11	234	78	3
	12	343	156	2.19872
	13	152	57	2.66667
	14	74	39	1.89744
	15	120	43	2.7907
HA ΔCTD GluA1 KI	1	151	60	2.51667
	2	132	77	1.71429
	3	89	45	1.97778
	4	38	18	2.11111
	5	89	29	3.06897
	6	145	80	1.8125
	7	88	24	3.66667
	8	51	13	3.92308
	9	204	48	4.25
	10	143	30	4.76667
	11	51	29	1.75862
	12	65	40	1.625
	13	150	20	7.5
	14	237	68	3.48529
	15	114	36	3.16667
	16	281	77	3.64935
	17	40	12	3.33333
	18	97	18	5.38889
	19	80	10	8
	20	49	9	5.44444

## Sheet: Panel F
Source data Figure 2
LTP Experiments. EPSC (% of baseline). Nicoll lab
		HA ΔCTD GluA1 KI													WT																	HA ΔCTD GluA1 KI average	HA ΔCTD GluA1 KI SEM	Control average	Control SEM		Statistics summary (min 45)
	Cell #	1	2	3	4	5	6	7	8	9	10	11	12	13	1	2	3	4	5	6	7	8	9	10	11	12	13	14	15	16							Unpaired t-test
	Time (min)																																				P value	0.3684
Baseline	-3	77.3803	104.44	94.9735	112.923	89.8176	85.2286	103.726	106.876	88.3043			67.1886	86.4417			81.1844	92.2053	110.893	67.9325	98.1241	92.8307	106.171	92.2356	75.0954	67.6465			98.7287	82.4269		92.4817	4.13642	88.7895	3.5245		P value summary	ns
	-2	102.155	96.436	105.965	91.6645	103.48	110.907	88.2801	83.8179	108.83	79.7204	85.3825	106.587	97.2341	96.7211	93.8341	79.2652	86.844	103.726	106.372	88.6104	109.199	93.8411	93.9533	102.44	131.304	88.9762	93.2545	104.415	90.7001		96.9585	2.87159	97.716	2.55429		Significantly different (P < 0.05)?	No
	-1	120.465	99.1242	99.0616	95.4126	106.702	103.864	107.994	109.306	102.866	120.28	114.617	126.225	116.324	103.279	106.166	139.55	120.951	85.3808	125.696	113.266	97.9702	99.9883	113.811	122.464	101.05	111.024	106.746	96.8566	126.873		109.403	2.64304	110.692	2.66715
Pairing	0
	1
Post pairing	2	373.612	173.368	211.539	261.064	245.83	176.601	334.879	446.893	160.571	111.327	70.2982	272.545	148.499	250.711	255.716	375.955	394.101	98.8815	104.954	224.399	279.656	211.009	169.228	246.496	260.892	117.354	137.881	249.385	54.5836		229.771	29.8653	214.45	22.5143
	3	389.793	188.832	190.157	283.901	219.907	137.353	201.269	283.942	133.325	138.841	117.405	293.629	200.108	237.572	276.547	439.005	346.881	120.922	121.801	185.606	242.074	197.566	189.246	202.29	145.914	131.842	192.168	263.521	104.869		213.728	22.0686	212.364	18.0631
	4	392.403	197.443	181.987	221.085	192.89	142.226	213.341	214.485	185.848	153.494	203.466	314.194	193.008	184.79	277.331	498.956	372.612	116.269	117.972	207.783	251.655	199.201	221.328	253.432	199.072	127.606	219.753	328.203	154.317		215.836	18.5664	233.143	19.1208
	5	460.966	218.267	221.818	290.16	224.254	174.272	217.358	219.624	135.953	171.218	222.83	334.408	163.024	230.395	271.104	528.059	402.858	109.817	101.551	217.062	270.106	207.628	241.027	266.577	173.385	226.078	289.554	361.357	222.899		234.935	23.7505	257.466	20.9481
	6	458.117	249.854	208.623	272.158	279.473	122.596	177.405	160.001	105.579	228.012	256.676	331.905	191.385	261.327	249.664	525.225	367.59	134.964	123.677	207.426	262.271	258.601	241.847	271.753	255.17	281.496	381.302	265.516	167.441		233.983	25.8423	265.954	20.0853
	7	417.825	221.079	187.249	327.104	253.792	150.4	222.951	184.844	104.798	283.159	303.344	351.144	114.822	228.265	267.16	618.698	477.762	149.175	115.17	230.713	245.939	228.399	272.226	301.108	239.842	230.74	307.951	399.148	157.171		240.193	26.0765	279.342	25.8595
	8	454.039	230.889	151.806	258.327	204.165	103.383	235.547	136.781	109.238	265.474	337.085	345.353	99.1208	258.494	264.408	541.968	424.105	141.357	123.198	224.789	221.553	204.296	300.027	302.377	191.969	211.622	274.857	435.574	164.474		225.478	29.9583	267.817	24.2527
	9	472.944	249.678	196.695	254.429	201.947	136.145	208.85	147.342	118.155	350.148	318.429	339.679	158.703	273.966	251.127	640.548	448.706	142.525	113.623	211.424	211.702	253.328	314.221	298.906	297.97	235.385	256.762	500.449	144.352		242.55	28.6245	287.187	27.7212
	10	514.28	240.584	176.418	254.53	189.091	135.879	184.892	153.502	158.511	370.303	323.989	368.166	134.135	275.906	272.524	594.753	421.686	152.943	82.4021	221.585	207.585	218.79	301.668	320.466	182.66	247.07	343.131	475.325	170.617		246.483	32.1451	280.569	26.4117
	11	551.735	242.707	198.872	271.308	279.504	136.242	189.785	164.062	139.559	330.044	306.178	397.681	123.526	234.633	249.621	542.62	500.92	139.605	107.323	213.629	196.835	228.658	282.053	305.253	178.233	276.866	424.745	411.833	154.223		256.246	33.7835	277.94	26.3675
	12	571.217	268.231	218.952	277.879	183.955	126.678	193.679	100.719	126.149	323.456	320.252	416.623	136.813	250.14	221.397	517.319	517.994	174.57	134.305	225.32	175.928	250.853	319.737	319.93	184.865	290.22	311.093	364.839	202.778		251.123	37.2543	278.83	24.8726
	13	542.791	268.656	219.208	261.638	229.754	156.982	195.152	133.117	130.216	354.814	322.121	379.917	143.609	298.375	251.154	579.928	527.486	160.595	101.368	194.835	186.292	257.922	352.341	336.135	137.987	249.228	285.251	349.145	164.644		256.767	33.1109	277.043	27.1077
	14	573.079	260.69	202.391	268.984	192.252	103.063	215.555	111.372	129.292	413.203	321.262	375.123	111.049	236.262	233.022	673.948	517.796	177.127	89.4175	194.272	169.152	269.585	343.77	310.398	220.962	264.094	275.825	376.701	168.048		252.101	38.7001	282.524	30.147
	15	598.925	309.703	200.334	219.373	187.997	124.07	218.501	151.323	128.014	376.616	375.828	372.536	188.91	286.2	197.735	456.012	512.745	135.291	90.032	185.21	193.417	268.291	364.15	305.056	150.026	352.591	292.932	335.832	192.431		265.548	37.6811	269.872	24.5589
	16	534.834	275.158	183.5	241.473	191.158	94.8884	201.939	155.453	121.175	374.656	441.078	386.694	177.833	281.238	218.645	600.74	535.776		98.0804	187.17	172.828	230.033	291.424	316.513	202.642	336.823	303.832	414.405	191.461		259.988	37.2338	292.107	29.3247
	17	565.941	300.682	194.748		168.304	138.71	222.106	159.411	142.046	428.012	488.426	420.357	193.028	286.926	218.522	635.495	515.136		126.912	190.536	145.366	268.307	327.542	281.125	220.787	293.999	341.99	354.832	156.03		285.148	43.6165	290.9	30.3722
	18	561.624	311.636	207.807		192.981	130.867	187.169	159.922	117.871	472.624	462.221	385.262	213.457	339.148	192.04	538.358	503.622		124.515	212.361	151.828	271.931	302.849	295.221	185.739	285.212	331.511	431.551	161.317		283.62	43.5472	288.48	28.6998
	19	580.839	326.368	204.338		160.311	133.966	192.278	161	150.145	459.265	415.792	351.387	219.259	326.248	210.65	533.429	506.804		111.409	205.874	159.694	291.65	358.623	293.148	218.582	257.543	350.92	467.785	133.378		279.579	41.9332	295.049	28.0131
	20	582.095	308.59	207.976		242.579	139.81	207.655	158.64	116.006	490.008	410.186	358.822	200.108	327.283	186.797	432.631	516.508		120.734	198.347	158.187	305.239	356.27	291.031	180.21	308.787	311.587	500.186	117.707		285.206	42.5065	287.434	28.6264
	21	608.814	323.717	200.503		198.999	142.173	192.752	140.502	150.092	473.068	446.292	404.681	202.177	328.235	178.168	552.022	517.839		96.8043	207.66	165.986	286.975	372.817	282.446	203.569	291.779	318.774	485.612	147.699		290.314	45.3195	295.759	30.3637
	22	603.665	313.876	201.516		225.438	127.683	171.709	150.655	143.733	500.804	407.247	405.403	195.787	305.932	203.945	546.176	471.113			216.119	168.19	256.854	298.153	274.117	165.581	300.015	267.025	424.955	120.578		287.293	45.4269	287.054	28.6536
	23	606.755	354.791	204.483		155.783	119.657	186.108		167.961	474.1	393.881	377.308	133.689	334.817	175.921	519.097	513.438			208.537	168.711	235.533	315.318	298.767	192.738	361.007	345.218	408.508	166.281		288.592	48.7369	303.135	28.4517
	24	632.487	365.1	208.07		173.228	107.861	234.775		150.518	505.511	426.898	366.479	173.025	281.535	203.1	516.509	456.09			187.343	157.642	209.828	307.258	279.655	218.775	300.299	291.834	431.604	151.807		303.996	50.5901	285.234	28.0623
	25	626.491	391.503	199.22		245.435	85.8912	202.619		136.078	556.083	409.583	358.844	176.921	313.596	222.45	433.635	478.907			189.844	162.751	175.501	279.541	276.559	205.791	254.551	305.606	360.028	149.981		308.061	52.7242	272.053	27.5864
	26	600.773	390.141	188.585		171.708	98.3506	229.326		158.405	528.986	398.206	305.295	158.784	261.184	192.562	455.009	445.678			185.763	157.33	167.057	283.492	272.347	177.83	352.173	343.798	377.752			293.505	49.9776	282.46	27.7923
	27	576.664	378.397	196.049		162.226	84.1601	213.835		142.312	573.441	448.191	334.037	196.537	303.719	195.27	431.487	513.991			188.075	166.745	183.363	294.98	257.769	170.289	356.346	373.535	449.851			300.532	52.2184	298.878	31.2738
	28	633.63	368.293	188.491		199.029	109.752	185.449		146.078	593.427	444.635	349.903	140.648	237.965	150.875	476.313	488.485			190.553	152.944	185.353	277.327	263.969	162.222	356.834	353.373	425.725			305.394	56.1	286.303	33.3687
	29	622.442	403.394	203.062		254.613	100.691	249.349		103.306	522.777	385.036	310.545	163.308	279.202	150.335	433.565	474.438			173.803	161.869	175.275	298.505	256.692	150.673	341.795	401.937	418.552			301.684	50.697	285.895	30.475
	30	625.349	413.191	202.544		243.034	101.738	236.433		141.264	483.865	430.68	349.574	196.699	318.274	153.174	392.135	473.928			171.509	156.582	176.31	296.823	260.726	155.485	319.637	376.913	413.233			311.306	48.8559	281.902	28.1681
	31	631.317	416.632	222.055		265.28	99.7717	210.581		120.091	507.392	392.043	317.534	198.344	313.858	137.507	430.905	457.066			167.166	149.678	166.232	316.447	267.216	173.543	349.117	343.583	341.046			307.367	49.7847	277.951	28.0555
	32	563.12	358.482	190.566		272.757	97.4423	231.242		97.2489	473.146	377.44	346.456	182.154	356.298	169.119	412.418	427.09			165.524	157.978	167.882	285.249	255.688	184.742	291.764	415.105	355.129			290.005	45.0413	280.307	27.1409
	33	606.571	366.77	190.897		207.963	98.6177	190.021		130.109	429.424	419.694	332.68	184.407	301.148	154.82	535.841	534.276			176.584	150.353	149.618	269.894	253.955	159.02	282.945	419.689	394.862			287.014	47.096	291	31.9264
	34	618.267	387.886	202.306		250.207	85.6454	186.685		100.535	414.157	459.734	331.481	208.324	307.908	180.502	401.907	534.955			166.451	142.584		287.304	258.649	160.297	272.046	374.395	439.336			295.021	49.2937	293.861	30.7496
	35	613.498	374.912	202.23		260.054	77.738	203.308		109.86	435.319	404.384	325.446	205.383	356.62	167.979	392.013	457.914			163.693	147.926		264.026	246.835	156.098	316.031	431.329	353.293			292.012	47.4874	287.813	28.0664
	36	610.183	373.696	220.108		223.615	96.0639	222.229		114.567	463.566	393.459	333.697	229.787	329.449	202.56	451.435	390.635			177.64	137.733		261.567	276.444	171.251	297.101	479.849	361.446			298.27	46.4568	294.759	28.0128
	37	603.285	384.049	205.469		245.557	123.291	195.388		110.997	439.293	436.105	344.378	211.753	327.652	196.839	432.895	426.397			156.68	142.126		234.17	254.222	147.716	311.685	399.527	370.998			299.96	46.3703	283.409	28.2567
	38	618.859	347.748	196.329		230.149	97.6025	168.722			458.245	415.461	329.413	159.028	298.126	216.275	423.387	369.275			161.515	127.056		242.028	255.053	160.682			340.188			302.156	51.2988	259.359	29.4061
	39	588.485	370.284	224.266		243.491	95.1022	180.979			405.687	400.692	333.326	208.953	290.58	203.465	453.284	426.92			160.024	145.274		252.112	236.477	182.485						305.127	45.1771	261.18	29.9886
	40	565.899	391.708	204.772		256.042	94.1191	193.751			450.9	447.377	299.356	202.502	363.82	160.506	409.795	365.257			152.303	143.24		199.83	236.45	183.045						310.643	46.7444	246.027	32.1959
	41	564.079	356.315	191.271		235.498	125.738	183.605			450.154	435.88	269.629	201.365	365.379	192.484	371.642	404.64				137.996		242.369	245.911	206.159						301.353	45.2707	270.822	30.6976
	42	581.925	332.767	192.869		234.799	107.508	181.73			470.062	391.018	305.921	206.945	396.596	184.908	353.999	383.958				133.697		260.246	249.971	216.448						300.554	46.3347	272.478	29.7699
	43	501.978	345.58	174.736		243.916	109.506	184.945			422.457	379.851	293.957	205.24	347.444	161.812	406.045	412.844				143.583		217.506	238.295	176.203						286.217	39.4015	262.966	30.5205
	44	488.391	336.97	161.243		209.635	108.48				453.841	364.451	281.655	216.905	357.393	171.836	382.734	378.441				141.182		211.916	231.814	175.311						291.286	43.3551	256.328	29.7022
	45	501.681	335.71	166.786		209.24	95.5616				420.092	374.562	334.62	253.99	335.709	178.699	345.566	346.753				136.93		218.624	242.355	192.336						299.138	42.9824	249.621	25.7687

## Sheet: Panel G
Source data Figure 2
LTP Experiments. EPSC (% of baseline). Malenka lab
		HA ΔCTD GluA1 KI															WT														HA ΔCTD GluA1 KI average	HA ΔCTD GluA1 KI SEM	Control average	Control SEM		Statistics summary (min 45)
	Cell #	1	2	3	4	5	6	7	8	9	10	11	12	13	14	15	1	2	3	4	5	6	7	8	9	10	11	12	13							Unpaired t-test
	Time (min)																																			P value	0.606
Baseline	1	150.695	100.58	95.0491	91.7754	101.303	84.1736	102.499	100.989	92.5903	105.237	105.856	89.5679	97.791	86.2643	104.039	94.5874	107.586	108.976	126.612	97.4311	87.8863	110.367	104.083	94.9582	101.112	82.6305	108.828	87.8113		100.56	3.99548	100.99	3.29647		P value summary	ns
	2	93.4352	91.7647	114.404	94.0411	107.401	89.9738	74.8121	87.4526	94.8257	72.4457	103.339	98.0918	91.1399	107.891	104.255	71.3132	80.1009	97.9683	64.1572	102.189	100.764	96.9894	88.2345	102.913	94.7095	99.6186	113.978	91.9948		95.0183	2.99881	92.687	3.80741		Significantly different (P < 0.05)?	No
	3	58.5205	112.24	98.3052	103.704	88.9866	105.346	102.902	106.416	126.8	113.161	99.4088	97.7706	95.5151	87.3337	81.8277	116.871	107.488	120.733	72.4951	99.7028	125.011	105.476	99.1365	115.059	95.5762	87.0416	80.3478	89.2007		98.5492	4.06051	101.088	4.44711
	4	93.8397	90.1549	86.5017	100.824	97.2077	92.9474	118.24	88.9834	87.5338	98.778	91.9396	100.456	107.773	102.86	88.2172	97.6805	125.633	83.8436	111.328	91.5696	76.767	83.4476	120.979	105.148	98.2908	118.317	102.287	115.284		96.4171	2.25338	102.352	4.31796
	5	103.51	105.261	105.74	109.656	105.101	127.559	101.547	116.159	98.2498	110.379	99.4566	114.113	107.781	115.651	121.661	119.548	79.1918	88.4789	125.407	109.108	109.571	103.72	87.5675	81.9219	110.311	112.392	94.5596	115.71		109.455	2.13722	102.884	4.15357
Pairing		--	--	--	--	--	--	--	--	--	--	--	--	--	--	--	--	--	--	--	--	--	--	--	--	--	--	--	--		--	--	--	--
Post pairing	7	211.299	302.539	168.792	131.501	170.294	366.414	309.887	289.773	241.974	290.114	207.296	252.553	249.216	244.813	284.616	280.091	292.096	158.03	205.116	179.772	135.336	162.171	132.016	265.598	205.131	171.111	231.37	260.454		248.072	16.1308	206.022	15.3294
	8	235.107	217.457	148.482	133.08	207.895	313.166	308.095	270.265	188.397	266.034	134.5	236.153	272.955	232.941	275.089	295.131	260.671	125.862	178.212	146.538	166.563	169.149	154.882	290.163	223.835	157.01	118.928	260.822		229.308	15.0261	195.982	17.2228
	9	192.643	194.111	147.717	115.734	183.744	237.142	302.461	238.056	148.194	209.936	100.828	241.865	230.629	182.457	234.275	259.344	227.255	115.013	181.655	126.411	157.569	160.292	115.36	213.255	204.978	143.272	124.491	191.65		197.319	13.8352	170.811	12.8836
	10	195.044	187.362	158.547	119.463	147.747	245.836	253.477	227.7	138.536	190.571	104.562	231.181	192.982	137.961	166.039	249.682	227.753	117.401	158.059	104.52	156.332	124.573	121.753	213.401	190.109	102.612	120.091	199.057		179.8	11.8976	160.411	13.9663
	11	183.37	198.533	150.897	107.549	155.904	196.238	250.299	200.069	198.697	169.43	88.8106	219.836	168.862	166.762	137.257	254.667	200.257	115.849	136.723	96.1941	132.814	172.876	128.023	178.339	181.391	115.152	82.6925	171.658		172.834	10.7703	151.28	13.1562
	12	130.383	186.202	170.334	136.584	162.949	260.05	283.399	234.915	113.142	176.195	58.4716	215.664	177.705	128.404	144.418	249.047	201.719	115.606	124.882	115.88	103.745	123.804	100.682	182.999	164.694	132.921	88.0308	153.791		171.921	15.1758	142.908	12.7898
	13	185.771	174.725	160.457	152.04	245.715	208.38	238.96	208.473	158.969	207.544	87.326	214.426	176.278	192.576	137.876	231.052	211.578	131.04	136.36	125.528	139.236	167.302	134.162	176.278	171.015	125.373	88.4379	158.904		183.301	10.5545	153.559	10.6262
	14	172.925	177.146	148.791	139.138	155.534	272.516	287.886	187.57	151.314	158.979	76.2702	214.611	173.54	162.623	137.734	285.223	222.748	126.172	156.646	133.053	126.704	153.278	154.074	168.401	178.272	127.896	84.7791	189.748		174.438	13.5304	162.076	14.008
	15	147.532	207.497	149.448	118.028	152.37	271.069	306.973	204.618	130.502	181.767	118.123	200.926	165.946	169.609	132.605	309.003	212.774	116.272	149.552	119.45	173.007	162.671	158.18	159.613	210.041	136.152	113.309	159.7		177.134	14.0607	167.671	14.6148
	16	181.401	196.494	128.582	135.357	160.333	295.368	283.74	211.742	158.837	170.437	103.904	172.634	174.728	166.492	121.772	281.82	202.649	106.778	128.657	139.138	129.841	156.097	185.78	203.323	197.123	143.062	96.3709	147.422		177.455	13.8469	162.928	13.8989
	17	183.239	196.738	162.812	119.714	153.947	262.408	319.585	212.822	216.199	193.329	125.1	222.585	189.076	195.69	130.717	282.594	195.739	108.827	150.193	146.403	142.431	158.142	180.381	215.374	201.311	121.865	75.9953	122.944		192.264	13.6396	161.708	14.8826
	18	189.767	189.549	150.102	113.523	129.161	213.957	297.005	218.088	190.816	192.738	143.154	201.274	179.213	167.047	131.659	290.749	230.87	119.485	132.483	159.37	140.375	182.685	169.16	159.419	198.549	123.599	100.594	142.445		180.47	11.7452	165.368	14.2718
	19	206.683	189.157	162.557	105.095	121.482	236.069	272.334	219.309	226.828	221.775	130.641	214.986	171.108	192.066	164.648	297.535	185.344	125.215	131.048	122.774	142.309	175.492	217.766	227.291	222.783	112.719	149.587	191.452		188.983	11.9917	177.024	14.9609
	20	182.457	158.969	133.889	156.025	107.79	251.71	263.474	202.185	186.123	225.226	134.603	251.22	184.28	157.933	136.448	268.192	178.103	118.586	134.288	109.909	133.203	176.844	187.966	207.959	221.308	143.819	115.91	181.353		182.156	12.4431	167.495	13.0807
	21	168.838	193.902	184.034	133.282	123.047	225.808	284.433	185.113	242.937	177.931	108.399	224.105	167.824	167.88	141.973	273.923	189.727	137.005	152.687	147.132	151.406	166.227	193.525	197.882	229.784	138.282	84.1163	147.458		181.967	12.2497	169.935	13.218
	22	212.631	194.344	158.592	145.228	97.5109	257.685	260.986	206.983	217.273	185.888	104.977	195.348	201.804	149.75	117.432	225.878	194.186	131.117	152.087	129.442	143.885	184.302	191.077	216.162	207.448	137.433	133.707	78.2709		180.429	13.0301	163.461	11.9522
	23	203.874	196.078	151.014	113.275	114.376	207.572	261.455	168.54	161.825	175.494	128.026	213.583	189.573	111.644	138.222	245.105	203.786	154.109	155.8	127.709	130.832	162.408	194.055	190.328	204.978	133.818	101.041	128.183		168.97	11.3007	164.012	11.3733
	24	202.805	156.609	175.125	124.794	104.825	261.83	222.346	160.047	184.481	184.664	121.482	228.523	203.151	132.824	141.842	250.017	236.504	169.326	151.747	135.23	130.646	194.393	162.225	228.723	206.841	139.87	154.029	128.159		173.69	11.5714	175.978	11.8286
	25	224.692	180.96	127.239	115.183	150.244	291.908	215.059	141.798	170.541	172.028	130.178	216.975	181.012	129.601	149.5	226.553	199.581	126.069	129.129	110.932	121.302	177.441	186.453	245.993	208.189	143.238	197.31	112.551		173.128	12.3145	168.057	12.8619
	26	200.32	188.245	149.255	133.481	120.33	273.657	202.452	178.889	183.954	189.023	93.816	221.205	185.552	164.135	158.578	291.282	228.906	118.959	126.963	94.661	131.952	151.793	191.452	242.276	174.463	161.654	144.493	108.229		176.193	11.1642	166.699	16.0508
	27	210.547	184.27	179.57	110.954	130.656	249.517	233.408	158.784	190.372	178.764	137.058	195.412	189.285	132.648	138.812	241.28	224.311	136.19	153.123	99.8379	127.183	188.424	158.954	239.116	208.581	144.433	179.619	94.8137		174.67	10.2535	168.913	13.7107
	28	235.913	205.108	164.752	130.364	118.211	255.541	244.293	136.514	169.713	156.776	132.506	192.035	169.904	125.391	147.748	259.799	206.459	130.164	137.202	135.101	152.222	194.476	120.365	209.813	177.744	138.766	118.99	115.799		172.318	11.6059	161.3	12.3591
	29	200.317	208.229	159.252	115.846	133.863	272.103	227.873	139.526	169.741	141.159	148.601	195.055	164.224	124.96	134.2	227.227	238.359	144.664	151.327	97.6152	135.712	230.484	149.684	242.47	170.605	165.659	128.055	120.817		168.997	11.2723	169.437	13.6039
	30	233.569	178.63	171.704	113.982	121.739	289.935	209.913	154.542	190.975	152.581	135.357	191.001	175.871	140.235	169.92	216.171	255.985	136.132	147.325	94.703	131.682	185.541	167.71	192.518	179.456	168.671	190.065	94.6161		175.33	11.6865	166.198	12.6761
	31	178.815	203.319	169.24	100.858	124.086	277.778	212.475	150.647	176.374	166.242	93.6453	189.475	174.848	133.169	150.358	214.895	263.621	148.922	158.075	104.474	118.139	209.333	152.948	206.714	175.568	165.317	146.141	103.292		166.755	11.9011	166.726	13.0258
	32	168.1	262.001	167.574	130.226	131.21	305.457	220.847	123.507	184.193	152.983	107.568	170.898	170.917	119.711	127.712	198.21	240.536	118.74	155.455	107.433	114.798	200.601	162.318	170.316	182.703	148.074	155.13	110.98		169.527	14.3693	158.869	11.1239
	33	174.83	211.733	171.191	129.44	87.5898	247.984	230.644	177.987	183.247	166.982	95.13	179.257	171.892	137.162	134.954	207.875	236.644	136.299	145.431	121.029	139.347	198.819	155.427	216.34	180.15	147.603	150.373	119.751		166.668	11.5563	165.776	10.5691
	34	198.823	194.559	165.398	125.267	89.3816	255.816	245.432	160.195	181.528	178.888	99.2267	197.336	174.281	150.883	115.49	230.634	238.798	128.786	139.128	108.721	110.156	174.772	151.751	173.452	181.924	142.383	153.125	116.04		168.834	12.4228	157.667	11.5718
	35	191.601	214.583	165.24	117.491	90.4446	246.598	247.525	164.877	151.38	145.643	96.7423	150.791	172.264	185.256	130.742	201.724	176.804	127.692	160.325	109.56	136.655	186.864	176.884	201.695	192.911	181.07	128.947	110.489		164.745	12.2489	160.894	9.41695
	36	173.643	202.589	149.383	134.508	115.923	234.86	233.377	166.454	115.991	153.812	118.114	157.428	171.873	138.381	118.192	189.693	263.026	137.167	133.818	105.117	137.368	198.985	149.421	125.945	186.843	150.315	94.4136	93.696		158.969	10.1914	151.216	13.2838
	37	187.909	182.826	175.044	133.178	110.03	200.665	275.992	139.794	139.114	176.7	123.782	124.538	177.134	147.112	142.602	166.31	224.847	132.26	140.468	91.6766	111.296	160.665	162.45	128.078	190.541	158.316	105.823	99.9575		162.428	10.7387	144.053	10.6312
	38	164.134	185.589	147.31	134.249	91.9608	225.514	254.974	138.701	118.781	169.861	127.088	145.755	177.107	174.78	136.286	214.458	227.948	132.385	150.837	102.3	121.334	188.149	169.557	150.287	192.345	159.859	107.463	117.982		159.473	10.7	156.531	11.2224
	39	189.045	252.718	143.566	111.249	87.1764	243.322	237.122	130.589	108.959	170.381	101.624	166.874	183.899	125.845	123.78	180.225	235.08	136.322	143.473	95.1015	113.876	187.099	175.96	147.903	179.797	144.494	131.387	102.56		158.41	13.8573	151.791	10.8097
	40	203.22	249.923	130.009	106.694	101.089	249.703	200.955	136.257	106.377	182.482	132.708	145.268	159.126	116.03	126.051	214.921	188.444	132.243	150.396	103.696	132.88	193.359	162.406	166.286	199.329	160.011	127.341	112.672		156.393	12.8522	157.23	9.64278
	41	224.749	212.143	153.149	116.239	109.095	252.891	294.79	138.19	179.261	187.731	123.267	155.603	162.809	120.412	124.999	207.546	237.202	127.173	145.417	101.14	91.6112	170.317	171.363	161.575	203.483	168.002	83.6388	137.356		170.355	14.2156	154.294	12.8517
	42	212.007	273.795	154.718	106.538	107.968	290.406	302.574	138.343	129.875	144.016	120.666	139.977	182.181	130.232	104.955	191.458	197.011	127.708	136.904	103.621	109.584	171.179	148.949	129.051	205.717	141.023	117.373	114.595		169.217	17.6331	145.705	9.65208
	43	210.854	239.504	219.468	104.879	124.306	273.975	274.138	127.693	140.708	154.592	113.293	155.215	163.977	123.234	113.682	156.047	170.608	159.143	167.816	104.674	101.679	166.9	142.052	154.613	197.455	152.928	86.7475	88.9013		169.301	15.2188	142.274	9.75344
	44	182.184	185.566	182.004	108.951	77.6871	253.295	300.299	149.11	120.23	143.589	114.083	138.727	153.004	117.227	105.496	175.577	227.818	140.909	125.982	95.8423	112.236	211.158	150.351	131.727	157.13	105.506	111.394	103.422		155.43	15.1917	142.235	11.5218
	45	178.191	177.588	160.885	97.4063	98.1695	264.029	253.083	165.24	148.801	144.02	111.448	142.141	176.126	163.295	94.5084	183.95	176.978	144.929	135.094	108.467	119.297	197.496	164.601	120.643	206.645	125.052	153.19	99.7381		158.329	12.9965	148.929	9.63415
	46	199.073	183.701	159.626	100.985	108.979	243.294	242.521	145.211	154.862	165.922	143.75	151.942	163.358	110.544	76.694	164.232	232.055	140.234	139.249	95.7002	134.305	194.038	131.411	142.893	187.909	121.443	105.152	107.923		156.698	12.2988	145.888	10.8874
	47	173.97	180.987	189.268	103.485	136.282	297.421	266.132	154.062	145.529	154.111	114.04	167.143	153.09	142.79	96.0986	179.543	198.325	137.724	138.733	102.909	115.641	165.173	152.816	142.849	199.578	129.202	122.733	104.857		164.961	14.125	145.391	8.9761
	48	226.223	231.052	206.943	92.878	132.935	250.59	230.318	133.645	133.562	134.266	116.381	155.394	149.06	104.016	94.5453	202.748	236.222	171.724	123.071	87.6134	125.157	158.293	159.788	108.903	181.166	144.329	146.518	105.32		159.454	14.0645	150.066	11.5438
	49	201.295	228.463	166.857	96.0268	123.004	255.237	249.717	130.717	109.392	137.49	107.755	146.441	154.631	102.807	104.402	174.429	201.854	139.996	128.451	83.597	158.205	171.005	169.385	139.502	184.539	137.098	139.759	98.9108		154.282	14.1016	148.21	9.22881
	50	232.339	188.571	167.376	88.8864	100.087	277.239	249.817	122.339	130.661	132.924	95.3668	154.754	146.336	96.8902	96.1353	153.794	194.743	125.79	153.527	86.3973	145.469	177.958	129.943	125.415	175.57	94.7429	92.4873	84.6342		151.981	15.5935	133.882	10.2468
	51	227.109	179.624	203.443	72.1349	60.3964	247.207	285.256	142.95	138.529	139.572	113.311	159.065	125.391	78.4262	95.602	165.271	218.31	126.56	136.417	87.7183	127.171	166.726	125.704	139.938	186.121	137.01	122.267	85.4339		151.201	17.1685	140.358	10.1929
