# Supplementary material for: Long-term potentiation is independent of the C-tail of the GluA1 AMPA receptor subunit
Source: eLife. 2020 Aug 24;9:e58042. doi: 10.7554/eLife.58042 (PMC7500950; doi:10.7554/eLife.58042)
Supplement: Figure 3—figure supplement 1—source data 1. — Additional Morris water maze measurements. [file elife-58042-fig3-figsupp1-data1.xlsx]

## Sheet: Panel A
Source data Figure S5
Morris water maze. Swim speed (cm/s)/ training day. Gladstone Institutes Behavioral core																													Statistics summary
																													Hidden platform. Mixed effects analysis
Mouse #	HA ΔCTD GluA1 KI															WT													Fixed effects (type III)	P value
	1	2	3	4	5	6	7	8	9	10	11	12	13	14	15	1	2	3	4	5	6	7	8	9	10	11	12		Day	<0.0001
Day																													Genotype	0.0026
1	15.65	10.45	12.71	13.07	16.49	14.02	12.24	16.41	15.42	16.37	14.46	15.13	9.98	18.04	10.6	21.44	20.24	19.28	16.77	19.39	19.48	17.78	19.75	11.96	17.91	18.66	21.54		Day x Genotype	0.4549
2	15.82	9.21	14.78	14.83	16.46	14.92	10.36	11.58	12.92	12.49	11.19	15.23	11.43	12.35	15.34	16.15	16.52	17.56	16.79	15.35	21.42	13.22	18.65	12.34	13.86	17.3	19.7		Cued platform. Mixed effects analysis
3	17.58	9.63	11.64	16.11	16.25	15.4	13.71	10.7	18.7	10.41	12.41	13.36	10.98	11.7	14.78	19.9	18.17	14.18	17.45	13.31	18.75	10.43	19.6	10.08	13.4	18.25	17.52		Fixed effects (type III)	P value
4	16.68	10.9	10.98	7.89	14.41	14.39	11.79	12.56	10.77	11.48	13.17	16.16	8.93	10.51	11.54	17.68	12.54	14.07	17.16	9.87	16.69	7.05	15.67	12.53	16.6	15.44	18.33		Day	<0.0001
5	17.46	11.36	8.22	12.49	15.88	14.83	7.72	8.91	13.23	14.02	14.51	14.28	6.94	13.38	12.44	20.09	15.27	14.99	18.83	13.15	13.53	7.6	15.23	12.23	12.59	16.06	21.37		Genotype	0.0015
6	17.35	9.44	11.14	10.44	16.61	10.53	9.67	8.55	15.6	13	15.23	11.46	9.12	14.6	15.19	22.13	14.67	14.32	17.24	12.7	16.64	10.5	16.91	11.51	15.28	16.15	18.37		Day x Genotype	0.7219
7	16.93	8.68	12.52	12.21	16.21	14.11	12.06	13.44	17.29	10.12	15.47	10.79	13.18	15.3	9.91	16.91	15.37	15.7	16.8	16.93	16.7	12.24	16.37	11.3	15.22	18.14	18.38
8	20.52	11.28	7.68	11.39	19.32	14.07	9.95	14.22	17.09	10.75	12.03	10.92	17.22	13.07	14.21	19.41	16.34	15.95	19.12	15.5	16.88	13.87	18.39	9.72	13.65	18.87	17.74
C1	20.84	6.78	5.86	8.3	19.23	10.82	8.28	9.66	17.61	9.36	11.08	11.88	14.03	11.08	13.59	19.55	17.69	19.12	21.18	15.48	21.5	9.8	18.89	8.06	18.96	20.55	21
C2	20.47	14.88	9.55	8.76	23.22	16.76	6.83	14.94	19.61	10.68	12.77	10.06	18.32	13.4	17.22	24.98	22.56	19.21	21.68	21.78	25.27	11.53	22.77	13.1	21.85	20.99	21.58

## Sheet: Panel B
Source data Figure S5
Morris water maze. Latency (s) to find platform / training day. Gladstone Institutes Behavioral core																													Statistics summary
																													Hidden platform. Mixed effects analysis
Mouse #	HA ΔCTD GluA1 KI															WT													Fixed effects (type III)	P value
	1	2	3	4	5	6	7	8	9	10	11	12	13	14	15	1	2	3	4	5	6	7	8	9	10	11	12		Day	<0.0001
Day																													Genotype	0.0019
1	43.91	49.41	25.21	38.07	60	47.12	59.73	60	48.04	60	49.55	60	59.61	60	60	48.04	60	35.24	50.18	41.61	31.73	42.25	36.56	60	60	60	47.41		Day x Genotype	0.205
2	40.38	60	39.38	55.48	27.45	12.36	60	54.3	41.79	60	60	48.39	57.89	60	45.72	22.05	45.15	31.13	22.11	46.22	18.05	60	38.04	49.69	43.96	19.85	38.33		Cued platform. Mixed effects analysis
3	30.93	60	43.07	60	17.93	26.07	50.26	54.79	60	44.07	54.05	34.65	44.07	46.16	35.85	17.17	34.54	17.6	22.19	59.53	13.95	31.73	26.79	34.68	39.88	22.71	14.22		Fixed effects (type III)	P value
4	16.8	60	53.57	60	19.49	44.01	60	48.4	26.23	49.06	60	57.7	32.51	41.51	29.88	14.96	11.32	20.25	34.84	37.07	12.33	49.37	20.9	42.13	36.94	18.14	37.76		Day	<0.0001
5	27.72	48.18	44.41	37.09	9.87	51.58	37.96	39.1	11.03	38.98	51.21	33.56	16.77	30.86	19.35	14.27	6.11	16.01	22.07	36.71	8.26	39.12	24.27	46.61	25.74	14.62	41.08		Genotype	0.0024
6	12.95	49.57	39.76	31.28	24.98	44.8	32.32	28.3	8.54	38.11	53.83	11.03	25.08	20.67	25.05	18.12	6.88	8.29	10.77	34.02	7.99	30.92	9.25	27.33	6.77	9.31	15.21		Day x Genotype	0.0627
7	15.74	31.78	26.79	22.61	12.2	53.78	40.07	16.14	9.19	56.34	49.29	18.7	21.62	21.9	26.49	8.53	5.27	8.69	9.72	28.51	6.56	17.63	7.94	37.14	8.6	6.51	9.04
8	11.75	44.67	24.76	18.56	6.55	49.01	24.22	17.77	11.29	24.65	39.82	9.97	7.23	28.14	13.79	16.88	5.85	7.87	13.36	16.64	25.57	30.11	5.46	22.79	10.09	15.63	18.39
C1	17.89	23.84	23.26	17.42	5.19	15.52	21.07	14.75	5.7	16.62	14.91	12.13	12.84	22.27	18.43	6.56	6.64	11.68	4.59	8.91	10.25	15.9	4.7	17.26	7.1	5.69	6.36
C2	4.79	5.89	14.66	12.73	3.24	12.73	23.14	6.44	5.06	13	12.6	10.76	6.07	16.1	5.61	3.52	3.79	9.84	4.77	4.69	3.89	11.85	3.97	11.86	4.15	3.64	7.72

## Sheet: Panel C
Source data Figure S5
Morris water maze. 24 h probe. % time in quadrant. Gladstone Institutes Behavioral core
Genotype	HA ΔCTD GluA1 KI		WT			Statistics summary
Quadrant	Target	Others	Target	Others		WT target vs others (Paired t test)
Mouse #						P value	0.0152
1	60.56	13.18	32.31	22.6		P value summary	*
2	29.92	23.39	35.92	21.39		Significantly different (P < 0.05)?	Yes
3	20.97	26.38	42.04	19.35		KI target vs others (Paired t test)
4	29.42	23.56	45.55	18.18		P value	0.0498
5	67.46	10.88	32.92	22.39		P value summary	*
6	19.19	26.97	27.36	24.25		Significantly different (P < 0.05)?	Yes
7	6.17	31.31	27.31	24.27
8	49.83	16.76	69.74	10.12
9	29.7	23.47	25.08	25.01
10	31.31	22.93	27.97	24.04
11	45.49	18.2	38.32	20.59
12	83.75	5.45	22.91	25.73
13	10.96	29.71
14	44.43	18.56

## Sheet: Panel D
Source data Figure S5
Morris water maze. 24 h probe. Latency to 1st platform crossing (s). Gladstone Institutes Behavioral core
Genotype	HA ΔCTD GluA1 KI	WT			Statistics summary
Mouse #					Latency to 1st platform crossing (Mann-Whitney test)
1	4.64	5.87			P value	0.1976
2	18.89	3.4			Exact or approximate P value?	Exact
3	35.17	5.37			P value summary	ns
4	30.56	4.84
5	3.57	7.57
6	23.42	30.43
7	52.32	36.67
8	4.9	3.24
9	10.04	26.39
10	18.72	10.64
11	21.39	4.64
12	5.21	16.35
13	36.04
14	19.92

## Sheet: Panel E
Source data Figure S5
Morris water maze. 24 h probe. Swim speed (cm/s). Gladstone Institutes Behavioral core
Genotype	HA ΔCTD GluA1 KI	WT			Statistics summary
Mouse #					Swim speed (Unpaired t-test with Welch's correction
1	20.41	24.07			P value	0.015
2	12.89	19.64			P value summary	*
3	14.39	18.9			Significantly different (P < 0.05)?	Yes
4	16.43	20.58
5	20.96	22.68
6	17.57	21.48
7	17.97	14.03
8	19.3	20.27
9	18.89	15.07
10	16.41	18.68
11	15.14	22.52
12	18.29	22.91
13	13.82
14	17.62
