# Supplementary material for: Long-term potentiation is independent of the C-tail of the GluA1 AMPA receptor subunit
Source: eLife. 2020 Aug 24;9:e58042. doi: 10.7554/eLife.58042 (PMC7500950; doi:10.7554/eLife.58042)
Supplement: Figure 3—source data 1. — GluA1 CTD is not essential for spatial learning and memory. [file elife-58042-fig3-data1.xlsx]

## Sheet: Panel A
Source data Figure 3
Morris water maze. Distance (cm) to find platform. Gladstone Institutes Behavioral core																													Statistics summary
																													Hidden platform. Mixed effects analysis
Mouse #	HA ΔCTD GluA1 KI															WT													Fixed effects (type III)	P value
	1	2	3	4	5	6	7	8	9	10	11	12	13	14	15	1	2	3	4	5	6	7	8	9	10	11	12		Day	<0.0001
Day																													Genotype	0.0539
1	731.49	544.12	340.91	550.47	989.79	642.52	731.24	984.18	743.81	982.46	764.89	908.43	595.55	1082.83	636.25	1054.01	1214.7	668.16	841.68	800.09	607.17	736.25	786.55	717.64	1075.11	1120.19	1036.07		Day x Genotype	0.0207
2	674.21	552.74	629.73	823.76	483.24	186.06	621.71	677.06	627.35	749.79	671.42	791.29	667.81	741.14	715.51	375.51	755.39	563.67	369.99	714.19	393.6	793.72	756.01	654.68	665.23	363.08	792.57		Cued platform. Mixed effects analysis
3	558.35	578.31	511.28	967.06	293.41	443.51	696.08	623.53	1121.73	445.47	655.13	491.31	495.49	614.58	551.51	338.92	658.82	261.51	419.62	792.88	273.74	368.88	530.18	378.29	535.33	414.42	258.32		Fixed effects (type III)	P value
4	298.23	654.09	578.26	473.44	338.37	667.93	707.55	668.82	266.66	610.62	790.56	927.84	313.73	461.99	365.69	282.78	148.18	291.9	636.69	345.93	210.04	359.68	357.47	556.42	637.27	341.82	767.67		Day	0.0029
5	486.55	524.31	335.86	449.34	155.29	743.66	326.1	373.23	144.24	558.47	783.06	529.64	118.19	484.12	234.39	304.58	90.74	237.18	412.72	497.89	113.79	304.87	456.48	594.34	348.44	239.89	885.67		Genotype	0.259
6	222.38	449.91	459.37	316.48	437.17	480.81	294.3	296.14	136.17	530.58	821.03	127.78	223.59	297.56	371.92	427.12	98.96	118.44	189	471.4	128.64	364.92	143.55	331	102.41	162.96	297.18		Day x Genotype	0.5113
7	281.33	251.13	394.97	254.03	201.58	768.83	509.01	227.72	158.25	548.46	796.96	220.24	297.49	349.77	258.43	146.92	78.75	137.97	163.3	498.13	109.23	218.5	129.18	433.46	132.96	117.74	167.28
8	242.18	573.89	180.65	213.62	120.82	751.35	236.53	259.16	194.49	195.69	464.46	106.09	119.06	375.42	198.42	333.72	93.52	120.37	259.44	293.83	517.34	429.87	96.31	242.41	140.04	310.37	331.36
C1	361.54	137.11	111.44	142.75	98.86	166.17	189.3	125.92	99.11	113.07	140.11	138.15	171.94	219.73	245.48	125.73	115.02	223.94	93.56	128.99	216.8	161.64	85.42	134.09	128.63	117.17	131.14
C2	90.87	86.25	139.79	109.69	72.57	201.83	148.89	92.32	99.22	89.58	113.52	103.99	101.79	200.89	95.86	83.43	78.31	192.75	97.69	100.56	89.27	108.57	83.23	123.62	82.83	74.02	169.03

## Sheet: Panel B
Source data Figure 3
Morris water maze. 24 h probe. Number of platform crossings. Gladstone Institutes Behavioral core
Genotype	HA ΔCTD GluA1 KI		WT			Statistics summary
Quadrant	Target	Others	Target	Others		WT target vs others (Wilcoxon)
Mouse #						P value	0.001
1	8	0.67	5	1.67		Exact or approximate P value?	Exact
2	3	0	6	2		P value summary	***
3	2	2.67	5	1.67		KI target vs others (Wilcoxon)
4	2	1.33	6	1.67		P value	0.0012
5	9	1.33	3	1.33		Exact or approximate P value?	Exact
6	3	1.33	3	1		P value summary	**
7	1	1.33	2	1		WT vs KI number of platform crossings (Mann Whitney)
8	3	0.33	15	2.33		P value	0.5821
9	4	1.67	4	1		Exact or approximate P value?	Exact
10	3	1.33	3	1.33		P value summary	ns
11	5	1.33	7	3.33		Significantly different (P < 0.05)?	No
12	10	0.67	2	2
13	2	1.67
14	7	1.67
